# Supplementary material for: Identification of neuroblastoma cell lines with uncommon TAZ+/mesenchymal stromal cell phenotype with strong suppressive activity on natural killer cells
Source: HighWire-hosted journal article supplement (doi:10.1136/jitc-2020-001313), 2021-01-01
Supplement: jitc-2020-001313supp002_data_supplement.pdf [file jitc-2020-001313supp002_data_supplement.pdf]

## Supplementary Table 2

| <b>mAb</b>                          | <b>Company</b>                              | <b>Dilution</b>                                                 |
|-------------------------------------|---------------------------------------------|-----------------------------------------------------------------|
| anti-CD133-APC [293C3],             | Miltenyi-Biotec, Bergisch Gladbach, Germany | 1:25 in 5%FBS in DPBS                                           |
| anti-CD105-PE [REA794]              | Miltenyi-Biotec                             | 1:25 in 5%FBS in DPBS                                           |
| anti-CD90-VioBlue [REA897]          | Miltenyi-Biotec                             | 1:25 in 5%FBS in DPBS                                           |
| anti-CD73-FITC [AD2],               | BD-Biosciences, San Jose, U.S.A.            | 1:25 in 5%FBS in DPBS                                           |
| anti-CD146-PeCy7 [P1H12]            | BD-Biosciences                              | 1:25 in 5%FBS in DPBS                                           |
| anti-GD2-PE [14.G2a]                | BD-Biosciences                              | 1:25 in 5%FBS in DPBS                                           |
| anti-CD29-PE [MEM-101A]             | ImmunoTools, Friesoythe Germany             | 1:25 in 5%FBS in DPBS                                           |
| anti-B7-H6-APC [875001]             | R&D-Systems, Minneapolis, U.S.A.            | 1:25 in 5%FBS in DPBS                                           |
| anti-ULBP-2/5/6-PE [165903]         | R&D-Systems                                 | 1:25 in 5%FBS in DPBS                                           |
| anti-ULBP-3-PE [166510]             | R&D-Systems                                 | 1:25 in 5%FBS in DPBS                                           |
| anti-B7-H3-PE/Cy7 [MIH42],          | Biologend, San Diego, U.S.A.                | 1:25 in 5%FBS in DPBS                                           |
| anti-Nectin-2-PerCP/Cy5.5 [TX31]    | Biologend                                   | 1:25 in 5%FBS in DPBS                                           |
| anti-CD155/PVR-PE [300907]          | Biologend                                   | 1:25 in 5%FBS in DPBS                                           |
| anti-HLA A-B-C-Pacific Blue [W6/32] | Biologend                                   | 1:25 in 5%FBS in DPBS                                           |
| anti-MIC-A/B-AF488 [6D4]            | Biologend                                   | 1:25 in 5%FBS in DPBS                                           |
| anti-NKp46-V450 [9E2],              | BD-Biosciences                              | 1:25 in 5%FBS in DPBS                                           |
| anti-CD16-FITC [3G8]                | BD-Biosciences                              | 1:25 in 5%FBS in DPBS                                           |
| anti-NKp44-PE-Cy5 [Z231]            | Beckman-Coulter, Brea, U.S.A.               | 1:25 in 5%FBS in DPBS                                           |
| anti-NKG2D-PE/Dazzle594 [1D11]      | Biologend                                   | 1:25 in 5%FBS in DPBS                                           |
| anti-DNAM1-APC [11A8]               | Biologend                                   | 1:25 in 5%FBS in DPBS                                           |
| anti-YAP/TAZ [D24E4]                | Cells-Signaling Technology, Danvers, U.S.A. | 1:1000 in 5% BSA in TBST (WB)<br>1:100 in 0.5% BSA in PBS (IHC) |
| anti-Rabbit IgG-HRP                 | Cell-Signaling Technology                   | 1:2000 in 5% non-fat dry milk in TBST                           |
| anti-CD73 [1D7]                     | Abcam, Cambridge, UK                        | 1:200 in 0.5% BSA in PBS                                        |
| anti-CD105 [8A1]                    | Covalab, Villeurbanne, France               | 1:50 in 0.5% BSA in DPBS                                        |
