# Supplementary material for: Identification of neuroblastoma cell lines with uncommon TAZ+/mesenchymal stromal cell phenotype with strong suppressive activity on natural killer cells
Source: HighWire-hosted journal article supplement (doi:10.1136/jitc-2020-001313), 2021-01-01
Supplement: jitc-2020-001313supp003_data_supplement.pdf [file jitc-2020-001313supp003_data_supplement.pdf]

## Supplementary Table 3

| <b>Pathology diagnosis</b> | <b>Sex</b> | <b>Stage</b> | <b>Features of tumors</b>                       |
|----------------------------|------------|--------------|-------------------------------------------------|
| Neuroblastoma              | F          | I            | Ganglioneuroblastoma, intermix -<br>Stroma Rich |
| Neuroblastoma              | F          | II           | Stroma Dominant                                 |
| Neuroblastoma              | M          | II A         | Differentiated                                  |
| Neuroblastoma              | M          | III          | Poorly Differentiated                           |
| Neuroblastoma              | M          | IV           | Anaplastic                                      |
| Neuroblastoma              | F          | IV S         | Undifferentiated                                |
