# Supplementary material for: Identification of neuroblastoma cell lines with uncommon TAZ+/mesenchymal stromal cell phenotype with strong suppressive activity on natural killer cells
Source: HighWire-hosted journal article supplement (doi:10.1136/jitc-2020-001313), 2021-01-01
Supplement: jitc-2020-001313supp004_data_supplement.pdf [file jitc-2020-001313supp004_data_supplement.pdf]

## Supplementary Table 4

| <b>Primer</b> | <b>Sequence</b>                 |
|---------------|---------------------------------|
| TAZ forward   | 5'- ATGAGTATGCCCAATGCGCT -3'    |
| TAZ reverse   | 5'-TCTGGATTCTCTGAAGCCGC-3'      |
| CD73 forward  | 5'-CATCAGCTCTGCCTCTGTCC-3'      |
| CD73 reverse  | 5'-CTGGAGAGGGACAAGTGCAG-3'      |
| PD-L1 forward | 5'-TGTCACGGTTCCCAAGGACC-3'      |
| PD-L1 reverse | 5'-AGACAATTAGTGCAGCCAGGTCT-3'   |
| PD-L2 forward | 5'-AGCCCTAAGAAAACAACCTCTGTCA-3' |
| PD-L2 reverse | 5'-CACAGGTTTCAGATTCACAGCACT-3'  |
| GAPDH forward | 5'-TCTTTTGCGTCGCCAGCCGA-3'      |
| GAPDH reverse | 5'-ACCAGGCGCCCAATACGACC -3'     |
