# Supplementary figures and images for: Identification of neuroblastoma cell lines with uncommon TAZ+/mesenchymal stromal cell phenotype with strong suppressive activity on natural killer cells
Source: HighWire-hosted journal article supplement (doi:10.1136/jitc-2020-001313), 2021-01-01

## Supplementary Figure 1

**am**  
Onco  
Genomics

**Tumour Neuroblastoma – Kocak**  
custom - ag44kcwof

A

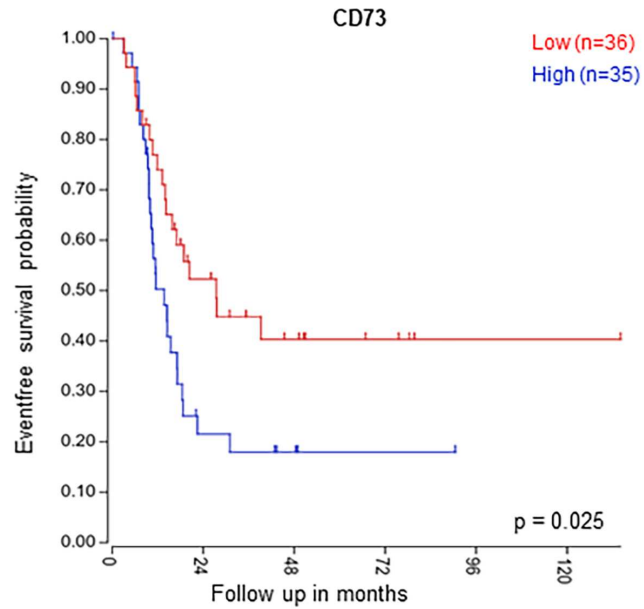

B

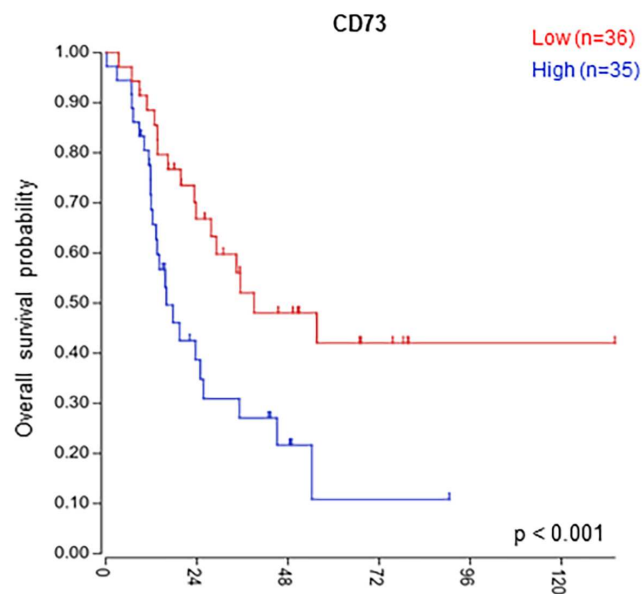

Supplement: jitc-2020-001313supp005_data_supplement.pdf [file jitc-2020-001313supp005_data_supplement.pdf]
